# Supplementary material for: A Call to Develop Course-Based Undergraduate Research Experiences (CUREs) for Nonmajors Courses
Source: Atypon-hosted journal article supplement (doi:10.1187/cbe.16-12-0352), 2017-04-28
Supplement: combinedsupmats.pdf [file combinedsupmats.pdf]

# Supplemental Material

*CBE—Life Sciences Education*

Ballen *et al.*

| Name               | Institution                           | Summary of undergraduate lab experience                                                                                                                                                           |
|--------------------|---------------------------------------|---------------------------------------------------------------------------------------------------------------------------------------------------------------------------------------------------|
| Cissy J. Ballen    | University of Minnesota               | Students use an original dataset obtained from the Program in Human Sexuality to consider predictors of committing sexual offenses among adolescents.                                             |
| Jessamina E. Blum  | University of Minnesota               | Oral Microbiome - Students generate and test hypotheses about antibacterial properties of different substances against two cavities-risk indicator bacterial species.                             |
|                    |                                       | Snapshot Serengeti - Students generate and test hypotheses about ecological data gathered through the Snapshot Serengeti citizen science project.                                                 |
|                    |                                       | Pennycress Project - Students screen and perform tests on Pennycress mutants with the goal of creating an optimized strain of the plant for winter crop cover biofuel production in Minnesota.    |
| Sara Brownell      | Arizona State University              | Conducts educational research on the effectiveness of CUREs using multiple approaches.                                                                                                            |
| Sadie Hebert       | University of Minnesota               | Students test hypotheses about sexual selection in bean beetles.                                                                                                                                  |
| James Hewlett      | Finger Lakes Community College        | Students design and run experiments as a way to optimize protein expression in a recombinant DNA / protein production system.                                                                     |
|                    |                                       | Students use genomic tools to test hypotheses related to the adaptive radiation of caribbean anoles.                                                                                              |
| Joanna R. Klein    | University of Northwestern - St. Paul | Students use an array of bioinformatic tools to annotate hypothetical genes in the marine bacterium <i>Cellulophage lytica</i> and clone one of their hypothetical genes in an expression vector. |
|                    |                                       | Small World Initiative - students isolate and identify antibiotic producing microbes from the soil.                                                                                               |
| Erik A. McDonald   | University of Washington, Tacoma      | Students quantify and compare micro-, macro-, and megaplastics at two different beaches in Tacoma, Washington.                                                                                    |
| Denise L. Monti    | University of Alabama                 | Tick Surveillance - Students analyze local, field-collected ticks for the presence of <i>Rickettsia spp.</i> as part of a proposed long-term tick monitoring program.                             |
| Stephen C. Nold    | University of Wisconsin-Stout         | Honey Bee Colony Collapse Disorder: students use molecular biology tools to discover honey bee pathogens in infected and healthy hives.                                                           |
| Krista E. Slemmons | University of Wisconsin-Stevens Point | Baseline Ecological Data Pre-CAFO: students generate biological baseline data of a local watershed prior to the potential construction of a concentrated animal feeding operation.                |
| Paula A.G. Soneral | Bethel University                     | Buckthorn to Biofuel - Students convert the invasive species Buckthorn ( <i>Rhamnus cathartica</i> ) into combustible biofuel                                                                     |
|                    |                                       | Breast Cancer Diagnostics - Students use RNAseq and DNA microarrays to classify and subtype human breast tumors.                                                                                  |
|                    |                                       | Small World Initiative - Students explore soil environments for antibiotic-producing soil bacteria.                                                                                               |
| Sehoya Cotner      | University of Minnesota               | Students test hypotheses about sexual selection in bean beetles.                                                                                                                                  |
